# Supplementary material for: On-demand gelation of ionic liquids using photoresponsive organometallic gelators
Source: Royal Society of Chemistry journal article supplement (doi:10.1039/d2sm00307d), 2022-01-01
Supplement: d2sm00307d1.pdf [file d2sm00307d1.pdf]

## Supporting Information

### On-demand Gelation of Ionic Liquids Using Photoresponsive Organometallic Gelators

Ryo Sumitani,<sup>a</sup> Masamichi Yamanaka<sup>b</sup> and Tomoyuki Mochida<sup>\*a,c</sup>

<sup>a</sup>*Department of Chemistry, Graduate School of Science, Kobe University, 1-1 Rokkodai, Nada, Kobe, Hyogo 657-8501, Japan. E-mail: tmochida@platinum.kobe-u.ac.jp*

<sup>b</sup>*Meiji Pharmaceutical University, 2-522-1 Noshio, Kiyose, Tokyo 204–8588, Japan*

<sup>c</sup>*Research Center for Membrane and Film Technology, Kobe University, 1-1 Rokkodai, Nada, Kobe, Hyogo 657-8501, Japan*

#### Contents

#### Experimental

Synthesis of [C<sub>6</sub>CNEt<sub>3</sub>N][Tf<sub>2</sub>N]

Synthesis of [CpRu(L')][B(CN)<sub>4</sub>] (**2-B(CN)<sub>4</sub>**)

#### Figures and Tables

**Fig. S1.** DSC curve of **1-PF<sub>6</sub>**.

**Fig. S2.** FT-IR and <sup>1</sup>H NMR (CD<sub>3</sub>CN) spectra of **1-PF<sub>6</sub>**, **1-B(CN)<sub>4</sub>**, and **L**.

**Fig. S3.** Photographs of **C** and **D**.

**Fig. S4.** <sup>1</sup>H NMR spectra (CD<sub>3</sub>CN) of **B–E**.

**Fig. S5.** FT-IR spectra of **A**, **B**, **D**, and **E**.

**Fig. S6.** DSC curves of the ionogels.

**Fig. S7.** SEM images of the ionogels.

**Fig. S8.** Viscoelastic moduli and complex viscosity of the ionogels.

**Fig. S9.** Storage modulus and loss modulus of the ionogels.

**Fig. S10.** Viscoelastic moduli and complex viscosity of the ionogels.

**Fig. S11.** Viscoelastic moduli and complex viscosity of the ionogels.

**Fig. S12.** Molecular structures of the cations of **1-PF<sub>6</sub>** in the crystal.

**Fig. S13.** TG-DTA curves of gelator **L**.

**Table S1.** Crystallographic parameters.

**Table S2.** Gel-sol transition temperature of the ionogels.

## Experimental

**Synthesis of [C<sub>6</sub>CNEt<sub>3</sub>N][Tf<sub>2</sub>N].** In a nitrogen atmosphere, an amount of 7-bromoheptanenitrile (1.84 g, 9.7 mmol) was slowly added to a solution of triethylamine (1.0 g, 9.88 mmol) in acetonitrile (2 mL). The solution was subsequently heated at 80 °C for 3 h with constant stirring. The solvent was then removed under reduced pressure. The resultant orange liquid was washed 10 times with hexane and dried under vacuum at 80 °C for 1 h to obtain [C<sub>6</sub>CNEt<sub>3</sub>N]Br as an orange liquid (2.5 g, 90%). Potassium bis(trifluoromethanesulfonyl)imide (KTf<sub>2</sub>N; 6.2 g, 19.4 mmol) was added to an aqueous solution (20 mL) of [C<sub>6</sub>CNEt<sub>3</sub>N]Br (2.5 g, 8.7 mmol), and the solution was stirred vigorously for 1 h. The resultant [C<sub>6</sub>CNEt<sub>3</sub>N][Tf<sub>2</sub>N] phase was collected and washed three times with water. The orange liquid was dried under vacuum for 3 h at 60 °C. The crude product was purified by column chromatography (alumina, eluent: dichloromethane/acetonitrile, gradient from 1:0 to 0:1). After evaporation of the solvent, the residue was dissolved in acetonitrile and heated to reflux, to which a small amount of activated carbon was added. The activated carbon was then removed by filtration without cooling. After evaporation of the solvent, the residue was dried under vacuum at 130 °C for 6 h. The desired product was a pale-yellow liquid (3.4 g, 69% yield).  $T_g = -72$  °C (DSC). <sup>1</sup>H NMR (400 MHz, CDCl<sub>3</sub>):  $\delta = 1.35$  (t, 9H, N(CH<sub>2</sub>CH<sub>3</sub>)<sub>3</sub>,  $J = 7.22$  Hz), 1.46 (m, 2H, NC<sub>3</sub>H<sub>6</sub>CH<sub>2</sub>), 1.56 (m, 2H, NC<sub>2</sub>H<sub>4</sub>CH<sub>2</sub>), 1.70 (m, 4H, NCH<sub>2</sub>CH<sub>2</sub>C<sub>2</sub>H<sub>4</sub>CH<sub>2</sub>), 2.39 (t, 2H, NC<sub>5</sub>H<sub>10</sub>CH<sub>2</sub>,  $J = 6.89$  Hz), 3.16 (t, 2H, NCH<sub>2</sub>,  $J = 8.51$  Hz), 3.29 (q, 6H, N(CH<sub>2</sub>CH<sub>3</sub>)<sub>3</sub>). FT-IR (ATR, cm<sup>-1</sup>): 600, 613, 653, 739, 761, 1052 (S=O), 1134, 1177 (C–F), 1330, 1348, 1397, 1460, 1487, 2246 (CN), 2869 (C–H), 2950 (C–H). Anal. Calcd. for C<sub>15</sub>H<sub>27</sub>F<sub>6</sub>N<sub>3</sub>O<sub>4</sub>S<sub>2</sub>: C, 36.66, H, 5.54, N, 8.55. Found: C, 36.48, H, 5.72, N, 8.38.

**Synthesis of [CpRu(L')][B(CN)<sub>4</sub>] (2-B(CN)<sub>4</sub>).** [CpRu(L')]PF<sub>6</sub> (2-PF<sub>6</sub>) was synthesized using the procedure identical to that for 1-PF<sub>6</sub> using L' (33 mg, 0.083 mmol) and [CpRu(CH<sub>3</sub>CN)<sub>3</sub>]PF<sub>6</sub> (30 mg, 0.069 mmol). The desired product was obtained as an orange viscous liquid (27 mg, 55%). <sup>1</sup>H NMR (400 MHz, CDCl<sub>3</sub>):  $\delta = 0.88$  (t, 3H, CH<sub>3</sub>,  $J = 6.89$  Hz), 1.26 (m,

18H,  $\text{NHC}_2\text{H}_4\text{C}_9\text{H}_{18}$ ), 1.58 (m, 2H,  $\text{NHCH}_2\text{CH}_2$ ), 3.21 (m, 2H,  $\text{NHCH}_2$ ), 4.00 (m, 2H,  $\text{PhCH}_2$ ), 5.26 (s, 5H, Cp-*H*), 5.60–5.88 (m, 4H, Ru–Ph-*H*), 6.98 (s, 1H,  $\text{NHC}_{12}\text{H}_{25}$ ), 7.22 (s, 1H, PhNH), 7.10–7.40 (m, 5H,  $\text{CH}_2\text{Ph-}H$ ). FT-IR (ATR,  $\text{cm}^{-1}$ ): 567 (P–F), 745, 1242, 1289, 1451 (Cp, C=C), 1465, 1482, 1563 (Arene, C=C), 1632 (C=O), 2847, 2916 (C–H). **2-B(CN)<sub>4</sub>** was synthesized using the procedure identical to that for **1-B(CN)<sub>4</sub>** using **2-PF<sub>6</sub>** (21 mg, 0.030 mmol) and  $\text{KB(CN)}_4$  (14 mg, 0.089 mmol). The desired product was obtained as an orange viscous liquid (13 mg, 65% yield). <sup>1</sup>H NMR (400 MHz,  $\text{CDCl}_3$ ):  $\delta$  = 0.88 (t, 3H,  $\text{CH}_3$ ,  $J$  = 6.89 Hz), 1.26 (m, 18H,  $\text{NHC}_2\text{H}_4\text{C}_9\text{H}_{18}$ ), 1.58 (m, 2H,  $\text{NHCH}_2\text{CH}_2$ ), 3.21 (m, 2H,  $\text{NHCH}_2$ ), 4.00 (m, 2H,  $\text{PhCH}_2$ ), 5.26 (s, 5H, Cp-*H*), 5.60–5.88 (m, 4H, Ru–Ph-*H*), 6.98 (s, 1H,  $\text{NHC}_{12}\text{H}_{25}$ ), 7.22 (s, 1H, PhNH), 7.10–7.40 (m, 5H,  $\text{CH}_2\text{Ph-}H$ ).

## Figures and Tables

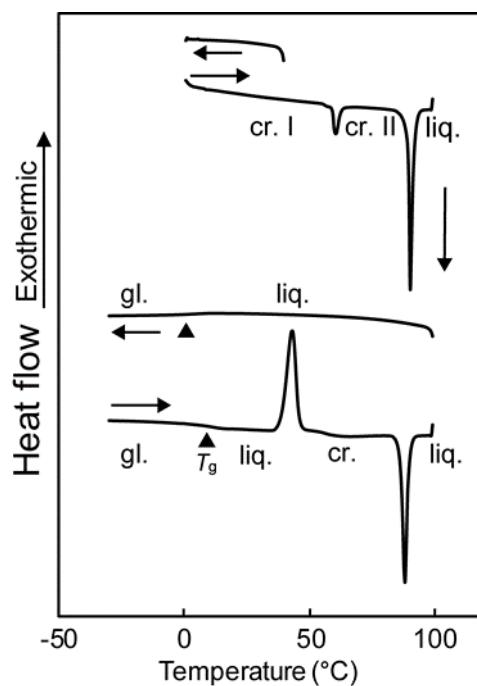

**Fig. S1.** DSC curve of **1-PF<sub>6</sub>**, where cr., liq., and gl. are the crystal, liquid, and glassy states, respectively. A cold-crystallization peak is seen at 45 °C in the second cycle.

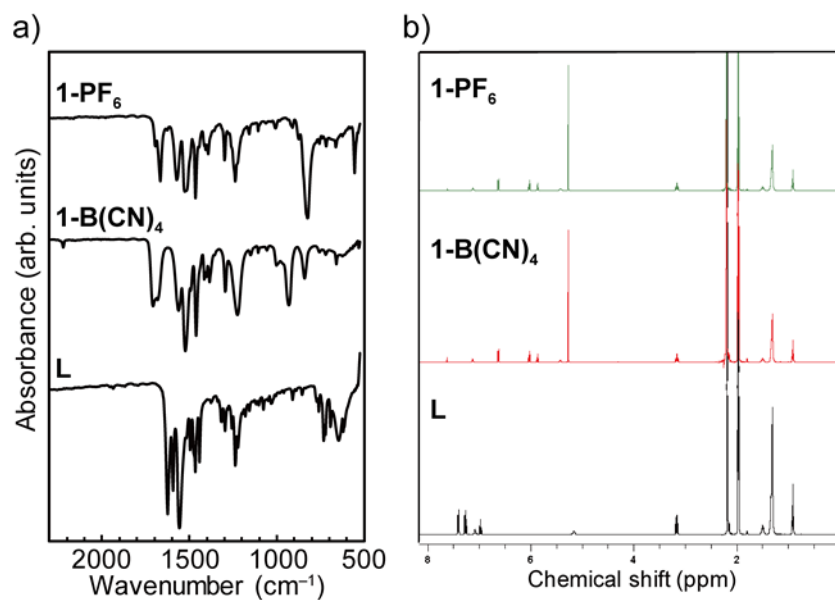

**Fig. S2.** (a) FT-IR and (b) <sup>1</sup>H NMR (CD<sub>3</sub>CN) spectra of **1-PF<sub>6</sub>**, **1-B(CN)<sub>4</sub>**, and **L**.

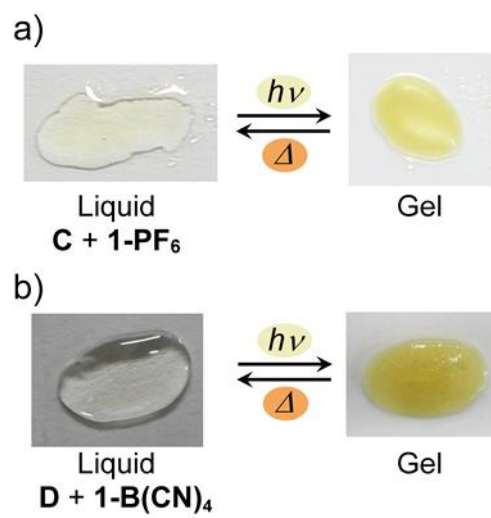

**Fig. S3.** Photographs of **C** (containing 5 wt.% **1-PF<sub>6</sub>**) and **D** (containing 5 wt.% **1-B(CN)<sub>4</sub>**) before and after photoirradiation.

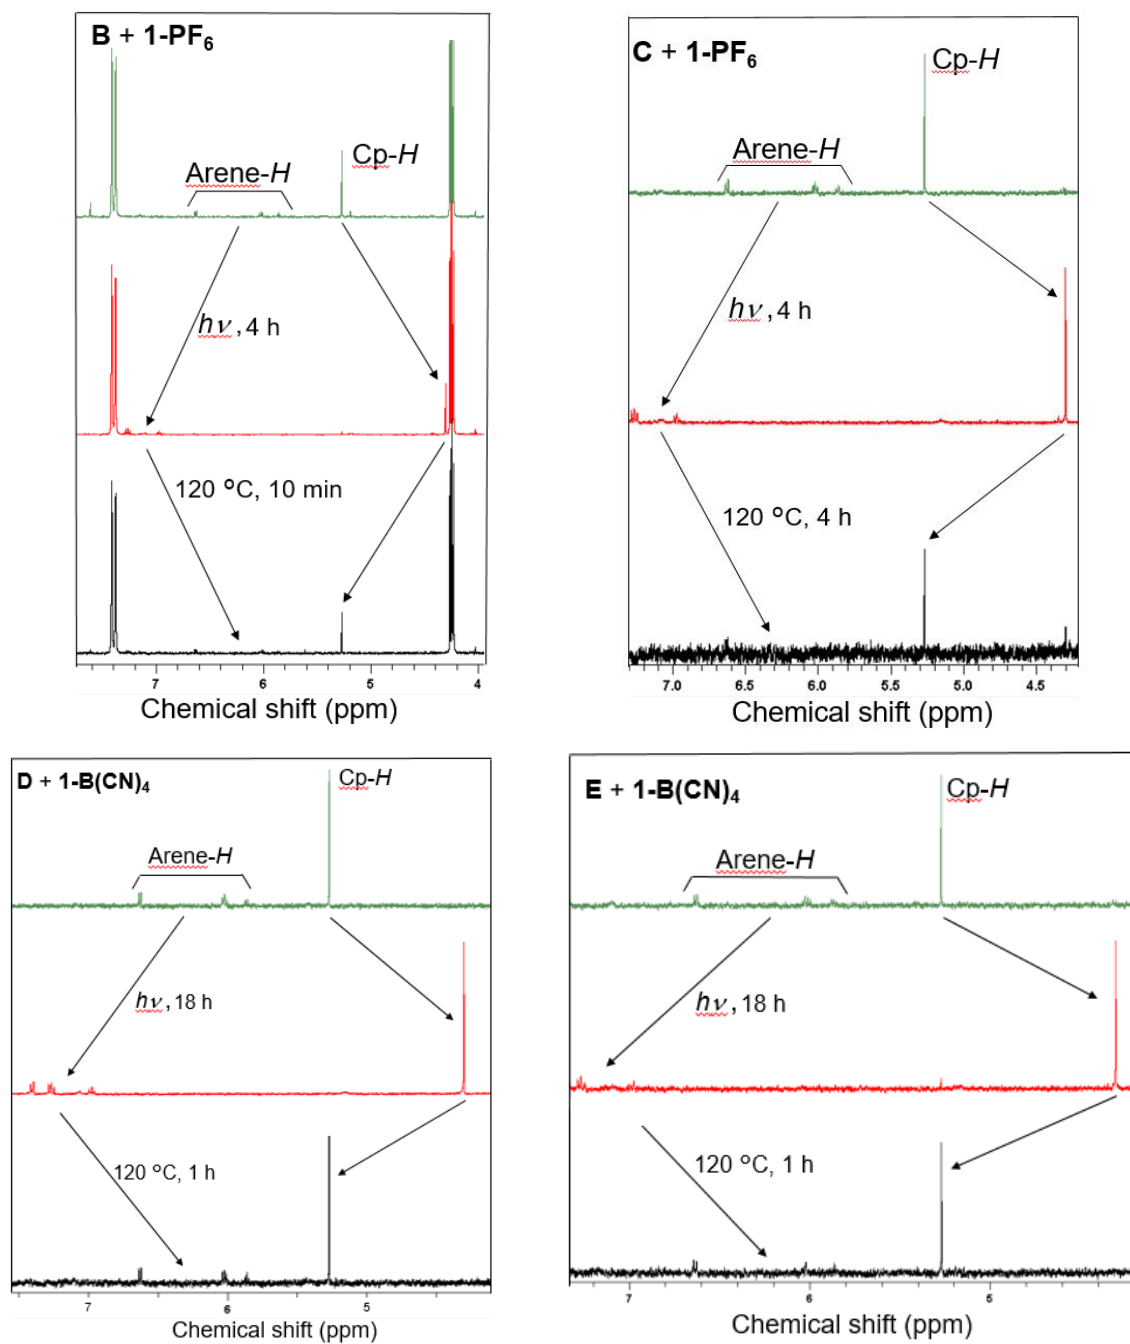

**Fig. S4.**  $^1\text{H}$  NMR spectra ( $\text{CD}_3\text{CN}$ ) of **B–E** (containing 5 wt.% **1-X**) before and after photoirradiation and subsequent heating at  $120\text{ }^\circ\text{C}$ .

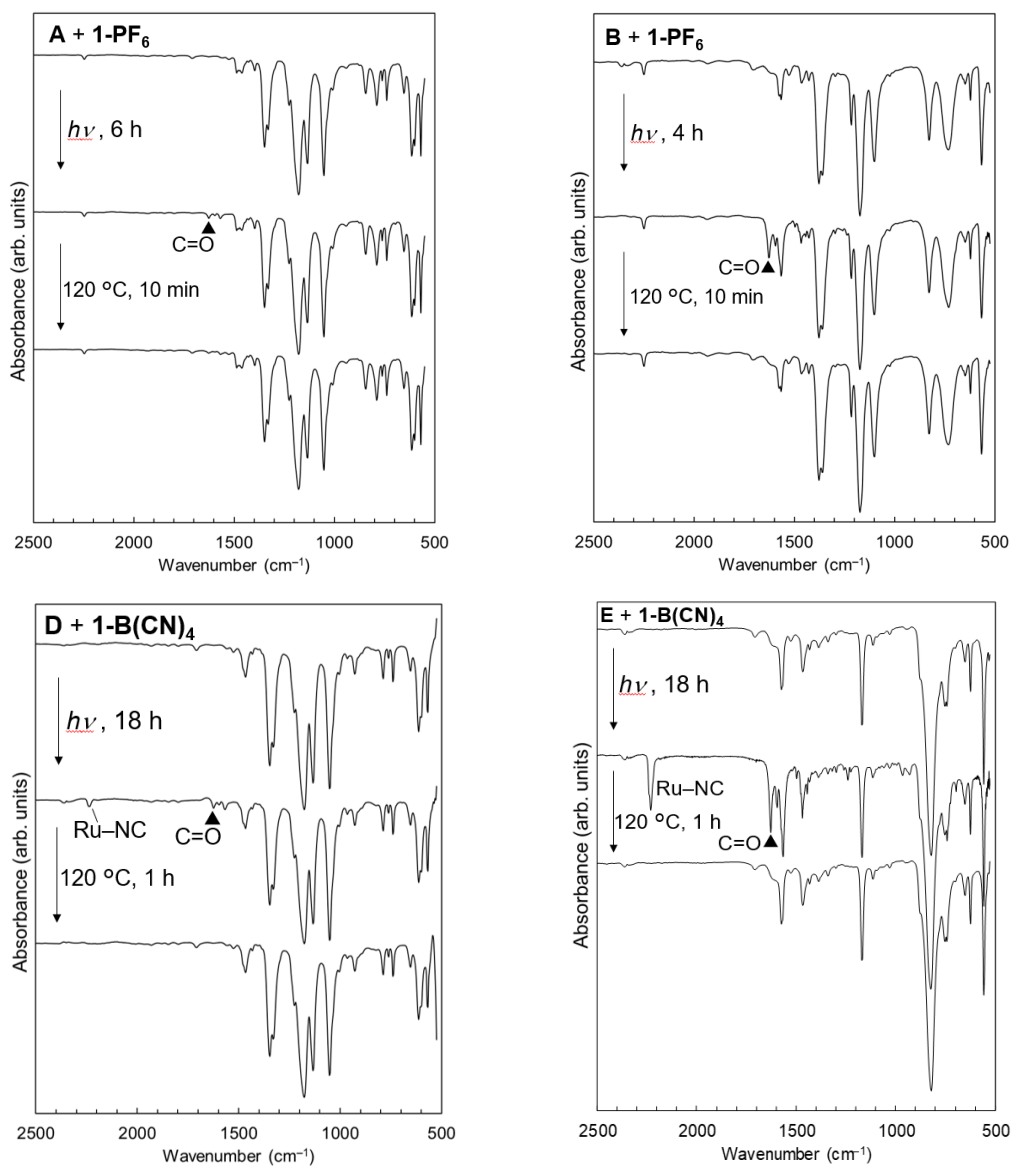

**Fig. S5.** FT-IR spectra of **A**, **B**, **D**, and **E** (containing 5 wt.% **1-X**) before and after photoirradiation and after subsequent heating at 120 °C.



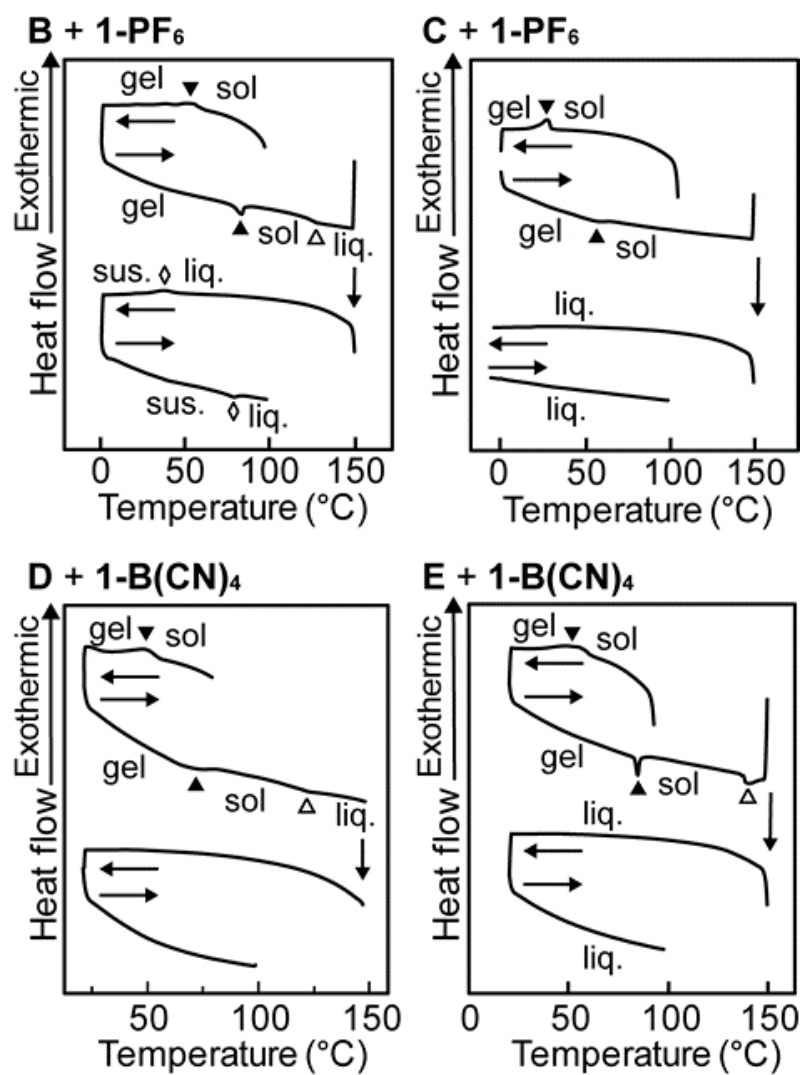

**Fig. S6.** DSC curves of the ionogels prepared by photoirradiation of **B–E** (containing 5 wt.% **1-X**), where liq. and sus. are the liquid and suspension states, respectively. The peaks corresponding to the gel–sol transition, gelator coordination, and dissolution of the complex are shown by ▲, Δ, and ◊ symbols, respectively.

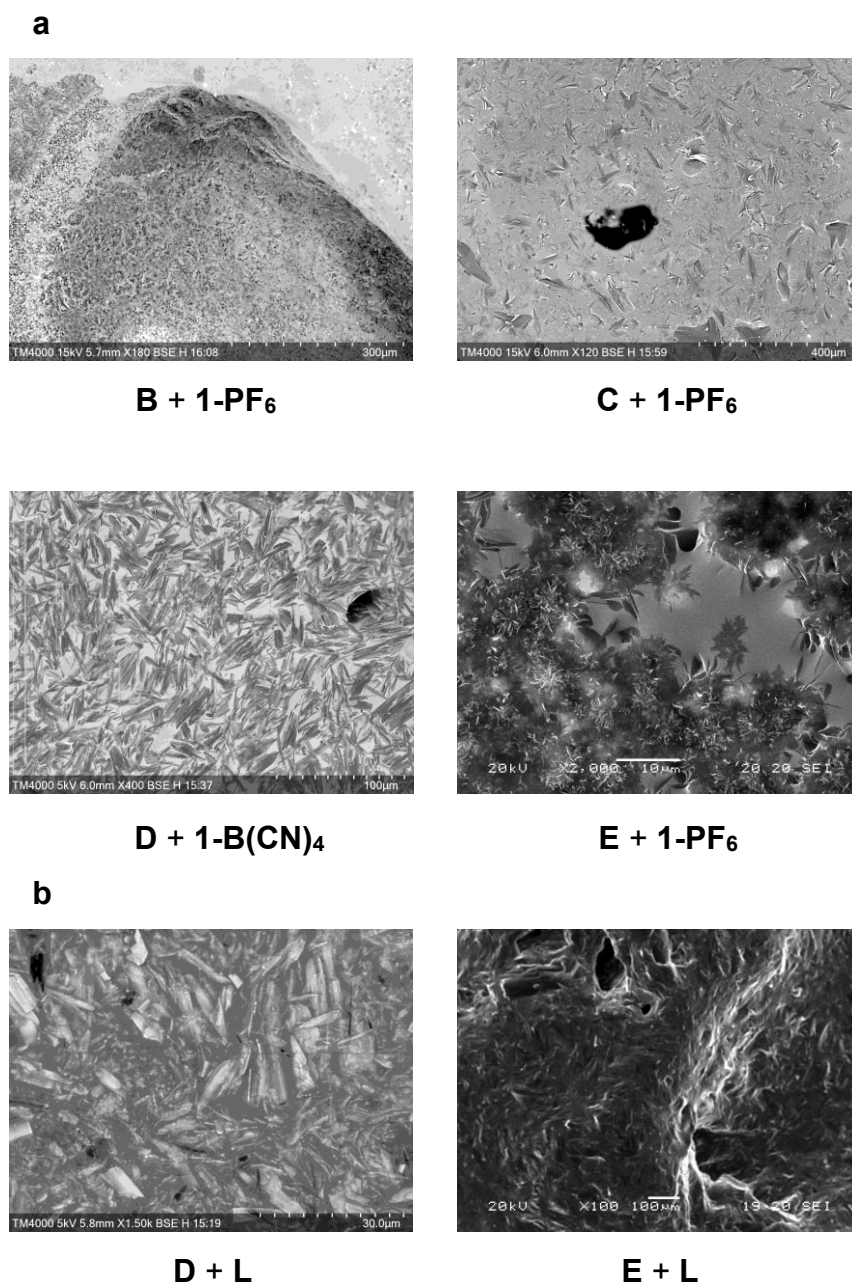

**Fig. S7.** SEM images of the ionogels prepared by (a) photoirradiation of **B–E** (containing **1-X** 5 wt.%) and (b) addition of gelator **L** (2.4 wt.%) to the ILs. The dark spot in the right figure in (a) is an artifact by electron beam damage.

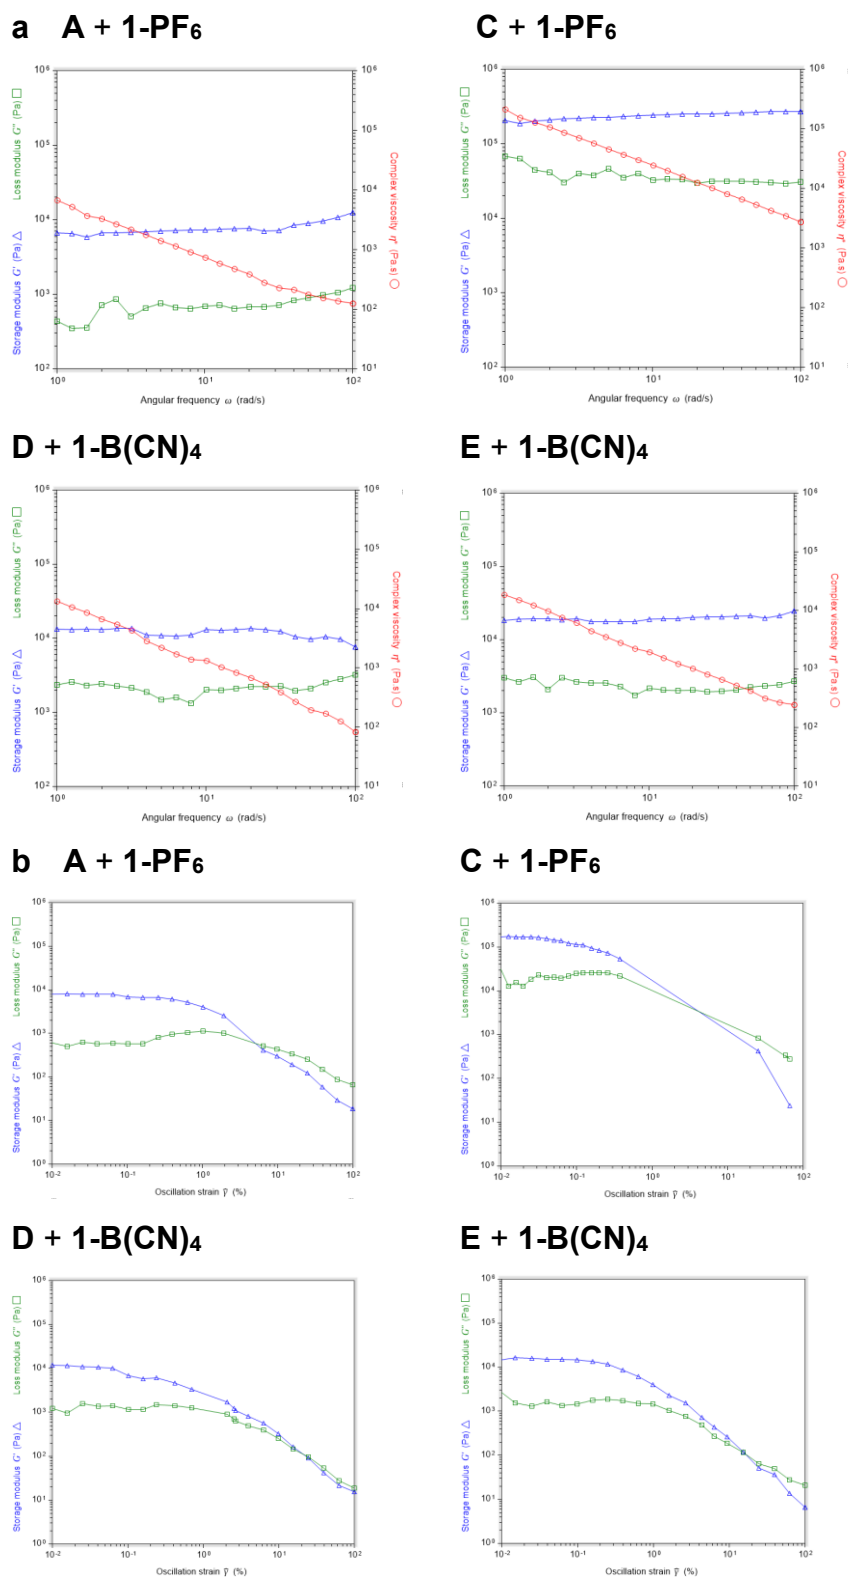

**Fig. S8.** (a) Angular frequency dependence (25 °C, strain 0.1%) and (b) strain dependence (10 rad s<sup>-1</sup>) of viscoelastic moduli ( $G'$ :  $\Delta$ ,  $G''$ :  $\square$ ) and complex viscosity ( $\circ$ ) of the ionogels prepared by the photoirradiation of **A**, **B**, **D**, and **E** (containing 5 wt.% **1-X**). Data for **A** and **C** are acquired after thermal treatment (100 °C, 30 s).

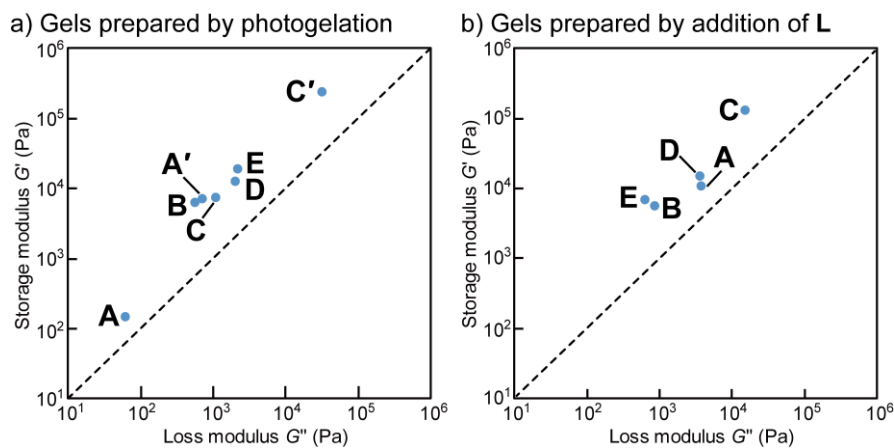

**Fig. S9.** Plots of storage modulus ( $G'$ ) and loss modulus ( $G''$ ) of the ionogels prepared by the (a) photoirradiation of A–E (containing 5 wt.% 1-X) and (b) addition of gelator L (A–C: 2.4 wt.%, D and E: 2.5 wt.%) to the ILs. For A and C, the values after thermal treatment of the gel (100 °C, 30 s) are also plotted (A' and C').

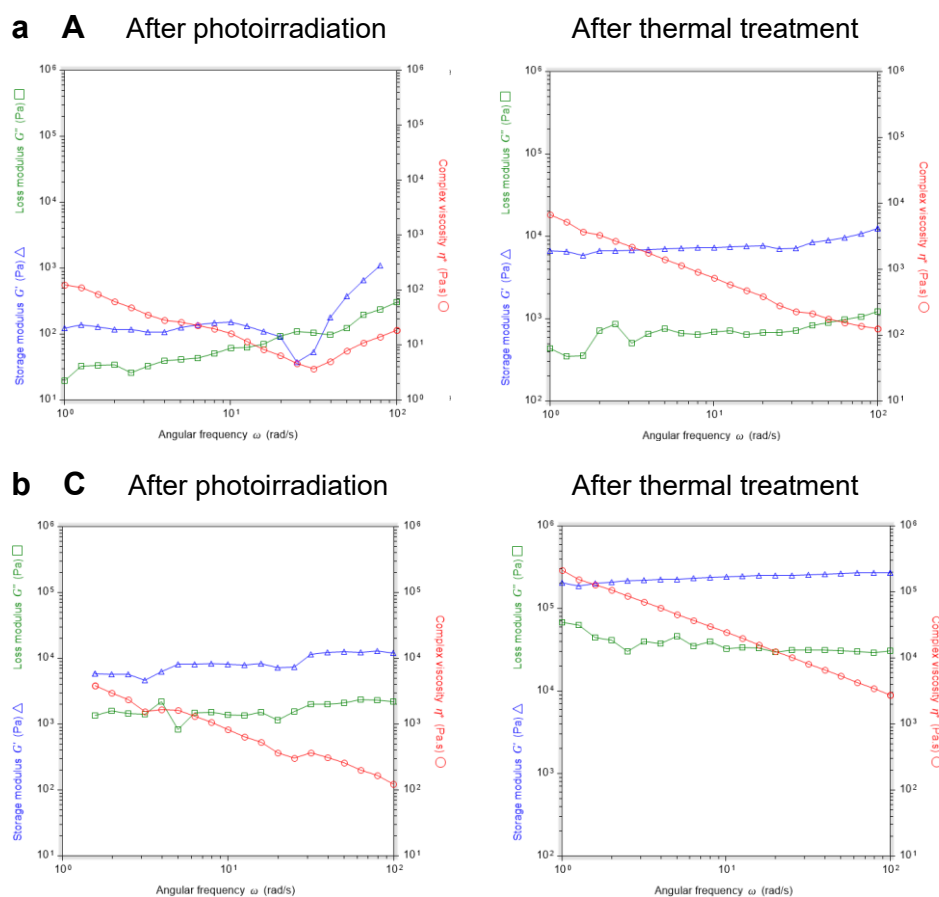

**Fig. S10.** Angular frequency dependence (25 °C, strain 0.1%) of the viscoelastic moduli ( $G'$ :  $\Delta$ ,  $G''$ :  $\square$ ) and complex viscosity ( $\circ$ ) of gels of (a) A and (b) C (containing 5 wt.% 1-PF<sub>6</sub>) formed upon photoirradiation. Data acquired immediately after photoirradiation (left) and after subsequent thermal treatment (100 °C, 30 s; right) are shown.

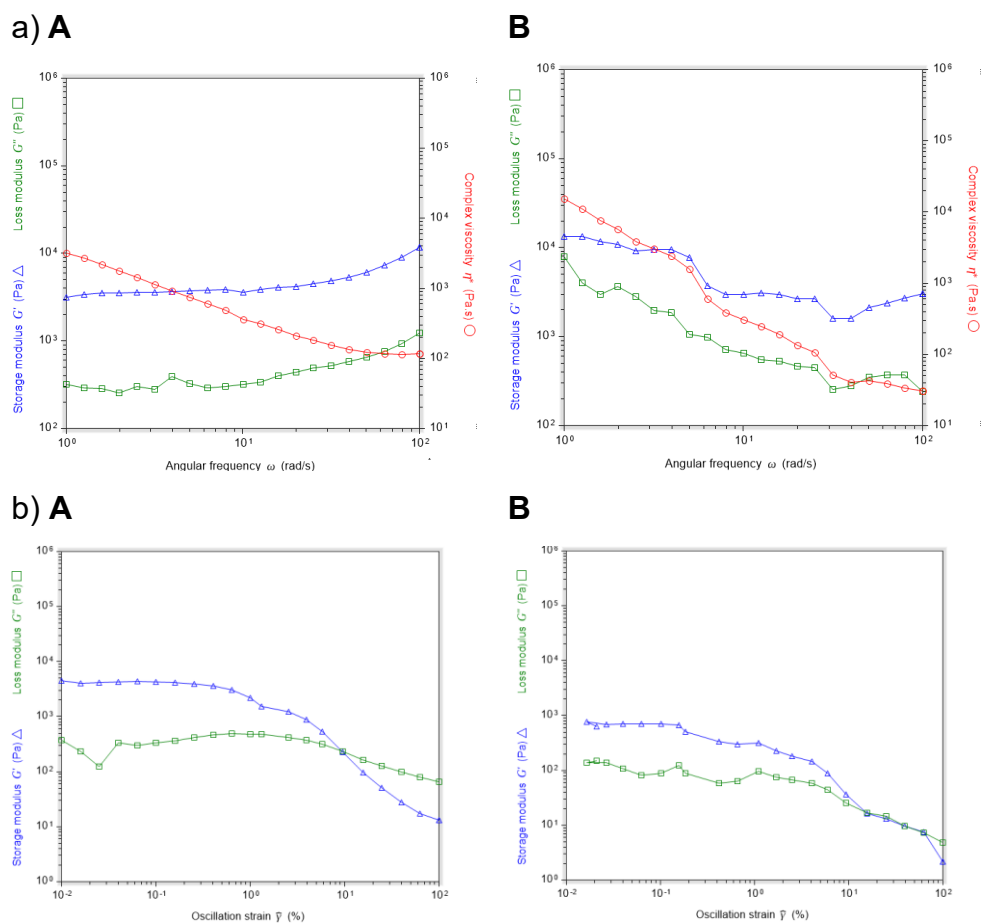

**Fig. S11.** (a) Angular frequency dependence (25 °C, strain 0.1%) and (b) strain dependence (10 rad s<sup>-1</sup>) of the viscoelastic moduli ( $G'$ :  $\Delta$ ,  $G''$ :  $\square$ ) and complex viscosity ( $\circ$ ) of ionogels from **A** and **B** (containing 5 wt.% **1-PF<sub>6</sub>**) after three cycles of photoirradiation. The data for **A** were acquired after thermal treatment (100 °C, 30 s).

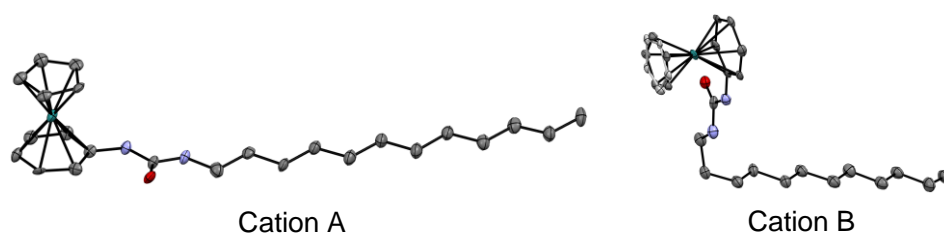

**Fig. S12.** Molecular structures of the cations of **1-PF<sub>6</sub>** in the crystal (-183 °C). The disordered moieties of cation **B** are displayed in gray.

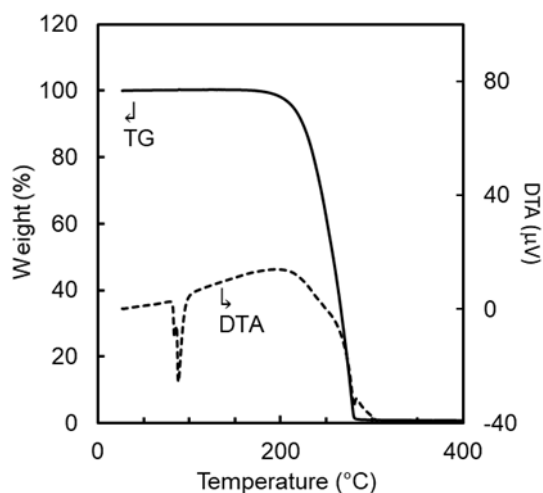

**Fig. S13.** TG-DTA curves of gelator **L** (10 °C min<sup>-1</sup>, N<sub>2</sub> atmosphere). There is a melting peak in the DTA curve at around 90 °C.

**Table S1.** Crystallographic parameters.

|                                                                                                        | <b>1-PF<sub>6</sub></b>                                            |
|--------------------------------------------------------------------------------------------------------|--------------------------------------------------------------------|
| Empirical formula                                                                                      | C <sub>24</sub> H <sub>37</sub> F <sub>6</sub> N <sub>2</sub> OPRu |
| Formula weight                                                                                         | 615.59                                                             |
| Crystal system                                                                                         | triclinic                                                          |
| Space group                                                                                            | <i>P</i> $\bar{1}$                                                 |
| <i>a</i> [Å]                                                                                           | 9.637(4)                                                           |
| <i>b</i> [Å]                                                                                           | 9.944(5)                                                           |
| <i>c</i> [Å]                                                                                           | 27.528(13)                                                         |
| $\alpha$ [°]                                                                                           | 95.325(6)                                                          |
| $\beta$ [°]                                                                                            | 97.691(8)                                                          |
| $\gamma$ [°]                                                                                           | 96.476(6)                                                          |
| <i>V</i> [Å <sup>3</sup> ]                                                                             | 2582(2)                                                            |
| <i>Z</i>                                                                                               | 4                                                                  |
| $\rho_{\text{calcd}}$ [g cm <sup>-3</sup> ]                                                            | 1.584                                                              |
| $\mu$ [mm <sup>-1</sup> ]                                                                              | 0.733                                                              |
| Temperature [K]                                                                                        | 90                                                                 |
| <i>F</i> (000)                                                                                         | 1264                                                               |
| Reflns collected                                                                                       | 9148                                                               |
| <i>R</i> (int)                                                                                         | 0.0363                                                             |
| Goodness of fit                                                                                        | 1.098                                                              |
| <i>R</i> <sub>1</sub> <sup><i>a</i></sup> , <i>R</i> <sub>w</sub> <sup><i>b</i></sup> ( <i>I</i> > 2σ) | 0.1041, 0.2448                                                     |
| <i>R</i> <sub>1</sub> <sup><i>a</i></sup> , <i>R</i> <sub>w</sub> <sup><i>b</i></sup> (all data)       | 0.1393, 0.2643                                                     |

$${}^a R_1 = \frac{\sum ||F_o| - |F_c||}{\sum |F_o|}, {}^b R_w = \left[ \frac{\sum w (F_o^2 - F_c^2)^2}{\sum w (F_o^2)^2} \right]^{1/2}$$

**Table S2.** Gel–sol transition temperature of the ionogels prepared by adding gelator L.

| IL                   | $T_{\text{gel}}$ (°C) |         |
|----------------------|-----------------------|---------|
|                      | heating               | cooling |
| <b>A<sup>a</sup></b> | 70                    | 41      |
| <b>B<sup>a</sup></b> | 85                    | 57      |
| <b>C<sup>a</sup></b> | 61                    | 33      |
| <b>D<sup>b</sup></b> | 69                    | 45      |
| <b>E<sup>b</sup></b> | 84                    | 47      |

The amount of gelator added: a) 2.4 wt.% and b) 2.5 wt.%.
